# Supplementary material for: Economic determinants of diet in older adults: systematic review
Source: HighWire-hosted journal article supplement (doi:10.1136/jech-2013-202513), 2013-06-12
Supplement: jech-2013-202513supp_appendices.pdf [file jech-2013-202513supp_appendices.pdf]

Appendix A. Search terms used in 8 databases to identify potentially eligible records for inclusion

| Concept      | Search terms (“/” indicating “or”)                                                                                                                                            |
|--------------|-------------------------------------------------------------------------------------------------------------------------------------------------------------------------------|
| Food         | Diet/ food habit*/ food choice*/ eating/ food purchasing behavior*/ food purchasing choice*/ food preference                                                                  |
| Influence(s) | Economic*/ finance*/ income/ resource/ wealth/ socioeconomic/ financial resource*/ financial circumstance*/ job/ money/ employment/ pension/ security/ retire*/ debt/ poverty |
| Change       | Change/ reduc*/ stress/ strain/ constrain*/ loss/ transition/ fall/ instab*/ fluctuat*/ decrease/ increase/ improve*                                                          |
| Population   | Ag?ing/ senior/ pensioner/ old* adult/ elder*/ aged AND NOT school/ youth/ adolescent/ child                                                                                  |

## Appendix B. Quality assessment of included studies

| Quality criteria                                                                                                                                           | Davies et al 1986[37] | Steen et al 1988[38] | Lauque et al 1998[39] | Lundberg et al 2003[40] | Nooyens et al 2005[41] | Smith 2006[42] | Chung et al 2007[43] | Abusabha et al 2011[44] | Helldán et al 2012[45] |
|------------------------------------------------------------------------------------------------------------------------------------------------------------|-----------------------|----------------------|-----------------------|-------------------------|------------------------|----------------|----------------------|-------------------------|------------------------|
| <b>Question:</b> Does the paper address a clearly focused issue? (i.e. clear statement of research questions & objectives)                                 | YES                   | YES                  | NO                    | NO                      | YES                    | YES            | YES                  | YES                     | YES                    |
| <b>Design:</b> Was study design described?                                                                                                                 | YES                   | YES                  | YES                   | YES                     | YES                    | YES            | YES                  | YES                     | YES                    |
| <b>Design:</b> Was method chosen & data sources appropriate to the research question?                                                                      | YES                   | YES                  | Can't tell            | Can't tell              | YES                    | YES            | YES                  | YES                     | YES                    |
| <b>Design:</b> Was data collection & analysis described?                                                                                                   | YES                   | YES                  | YES / NO              | YES                     | YES                    | YES            | YES                  | YES                     | YES                    |
| <b>Design:</b> Was exposure to change being considered clearly defined and ascertainment operationalised?                                                  | Can't tell            | YES                  | Can't tell            | YES                     | YES                    | YES            | YES                  | YES                     | YES                    |
| <b>Design:</b> Was a control group used to compare outcomes?                                                                                               | NO                    | NO                   | NO                    | NO                      | YES                    | NO             | YES                  | NO                      | YES                    |
| <b>Representativeness:</b> Was group exposed representative of elderly in the community (i.e. not based on convenience sample, occupation-specific, etc.)? | NO                    | NO                   | NO                    | YES                     | Can't tell             | YES            | YES                  | Can't tell              | NO                     |
| <b>Representativeness:</b> Were those not exposed also drawn from the same community (vs. a different source)?                                             | NO                    | NO                   | NO                    | NO                      | YES                    | NO             | YES                  | YES                     | YES                    |
| <b>Sampling:</b> Was sampling strategy clearly defined & justified                                                                                         | NO                    | YES                  | NO                    | YES                     | YES                    | NO             | YES                  | YES                     | Can't tell             |
| <b>Comparability:</b> Did the study control for bias (e.g. secular trends)?                                                                                | NO                    | NO                   | NO                    | NO                      | YES                    | YES            | YES                  | NO                      | YES                    |
| <b>Comparability:</b> Were factors possibly related to both exposure and outcome identified?                                                               | NO                    | NO                   | Can't tell            | YES                     | YES                    | YES            | YES                  | NO                      | YES                    |
| <b>Comparability:</b> Were groups comparable at baseline?                                                                                                  | Can't tell            | NO                   | NO                    | Can't tell              | Can't tell             | NO             | Can't tell           | NO                      | YES                    |
| <b>Completeness:</b> Was follow-up long enough for study objectives?                                                                                       | YES                   | Can't tell           | YES                   | YES                     | YES                    | YES            | Can't tell           | NO                      | YES                    |

|                                                                                                               | Davies et al<br>1986[37] | Steen et al<br>1988[38] | Lauque et al<br>1998[39] | Lundberg<br>et al<br>2003[40] | Nooyens<br>et al<br>2005[41] | Smith<br>2006[42] | Chung<br>et al<br>2007[43<br>] | Abusabha<br>et al<br>2011[44] | Helldán et<br>al 2012[45] |
|---------------------------------------------------------------------------------------------------------------|--------------------------|-------------------------|--------------------------|-------------------------------|------------------------------|-------------------|--------------------------------|-------------------------------|---------------------------|
| <b>Quality criteria</b>                                                                                       |                          |                         |                          |                               |                              |                   |                                |                               |                           |
| <b>Completeness:</b> Could all likely effects have appeared in the study's timescale?                         | YES                      | YES                     | YES                      | YES                           | YES                          | NO                | Can't tell                     | Can't tell                    | YES                       |
| <b>Completeness:</b> Could the effect be lasting/ not transitory?                                             | NO                       | NO                      | Can't tell               | Can't tell                    | Can't tell                   | Can't tell        | Can't tell                     | NO                            | YES                       |
| <b>Completeness:</b> Was follow-up sufficiently complete (ideally, >80% participants accounted for)?          | YES                      | Can't tell              | NO                       | YES                           | YES                          | Can't tell        | YES                            | NO                            | YES                       |
| <b>Results:</b> Were main findings reported & do they address the research question?                          | YES                      | YES                     | Can't tell               | YES                           | YES                          | YES               | YES                            | YES                           | YES                       |
| <b>Results:</b> Was the choice of statistical analysis appropriate?                                           | YES                      | YES / NO                | Can't tell               | YES                           | YES                          | Can't tell        | YES                            | YES                           | YES                       |
| <b>Results:</b> Was the primary outcome measure valid and reliable?                                           | YES                      | YES                     | YES                      | Can't tell                    | YES                          | YES               | YES                            | YES                           | YES                       |
| <b>Results:</b> Were tables/ graphs usefully labelled/ understandable?                                        | YES                      | NO                      | NO                       | NO                            | YES                          | YES               | YES                            | YES                           | YES                       |
| <b>Conclusions:</b> Were results compared with those of other studies, even if contradictory?                 | YES                      | YES                     | YES                      | NO                            | YES                          | YES               | YES                            | NO                            | YES                       |
| <b>Conclusions:</b> Is the interpretation appropriately based on results & alternative explanations explored? | YES                      | YES / NO                | Can't tell               | YES                           | YES                          | YES               | YES                            | NO                            | YES                       |
| <b>Conclusions:</b> Do the findings support the conclusions?                                                  | YES                      | YES                     | NO                       | YES                           | YES                          | YES               | YES                            | NO                            | YES                       |
| <b>Generalisability:</b> Can results be applied to other settings?                                            | NO                       | NO                      | NO                       | YES                           | Can't tell                   | YES               | YES                            | NO                            | NO                        |
| <b>Generalisability:</b> Were all important outcomes/ results considered?                                     | YES                      | YES                     | NO                       | NO                            | YES                          | NO                | NO                             | NO                            | YES                       |
| <b>OVERALL ASSESSMENT</b>                                                                                     | Medium                   | Medium                  | Low                      | Medium                        | High                         | Medium            | High                           | Medium                        | High                      |

SOURCE: Adapted from Effective Public Health Practice Project and the Newcastle-Ottawa scales as best quality assessment tools[36]
